# Supplementary material
Source: PubMed Central journal article supplement (PMC3565055)

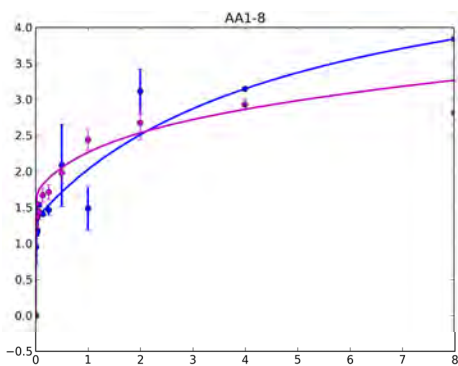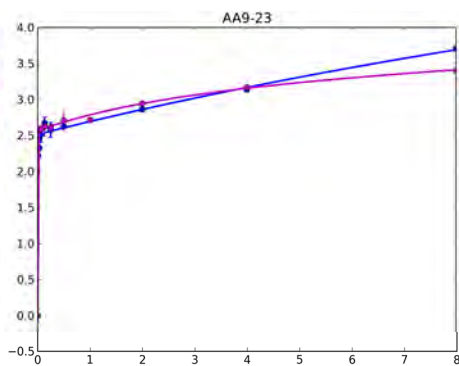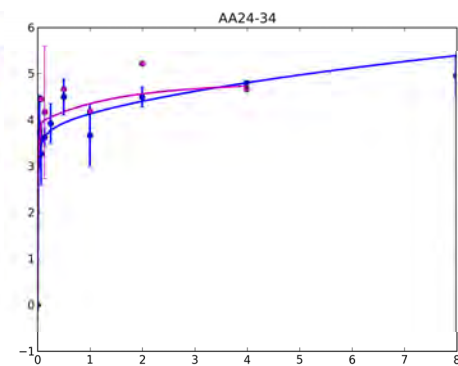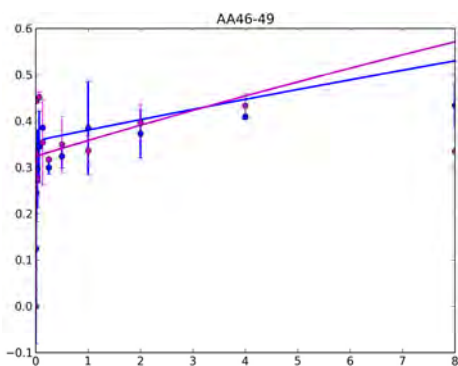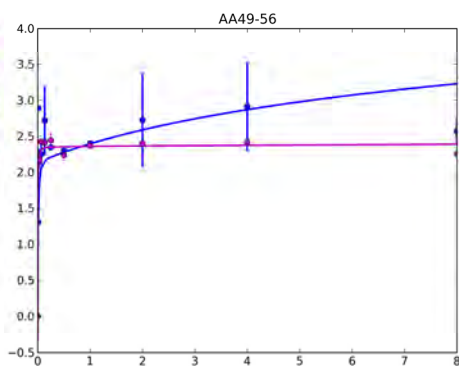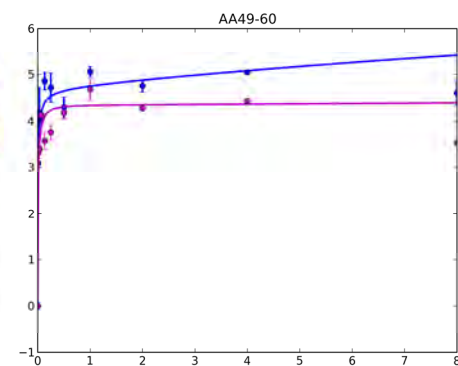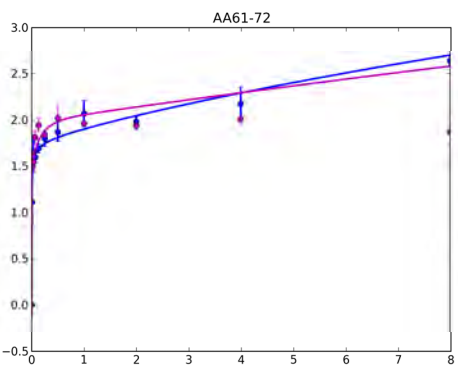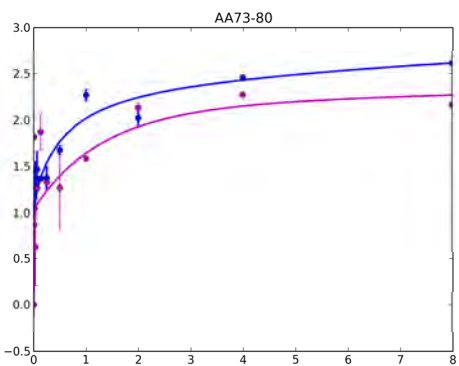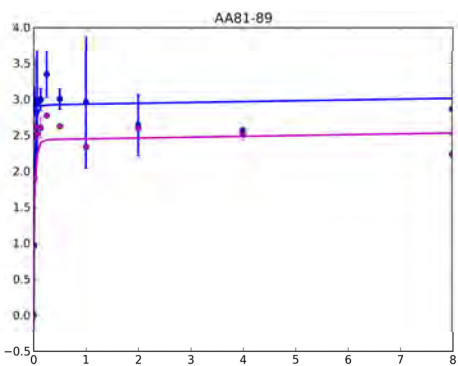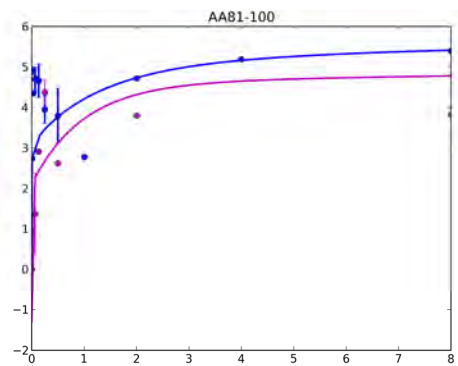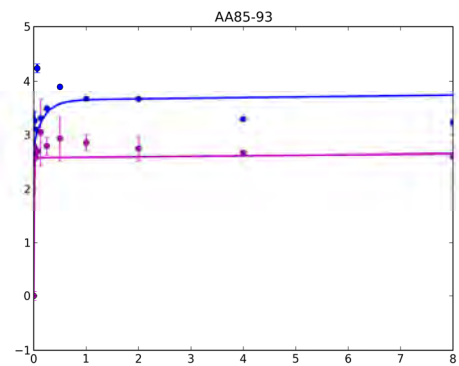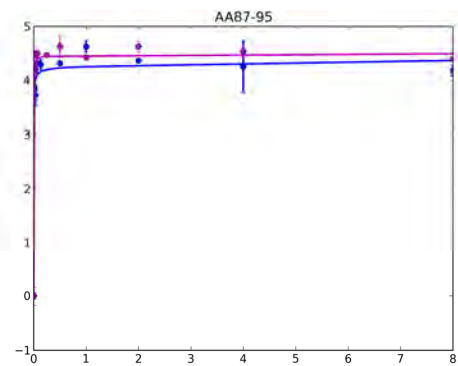

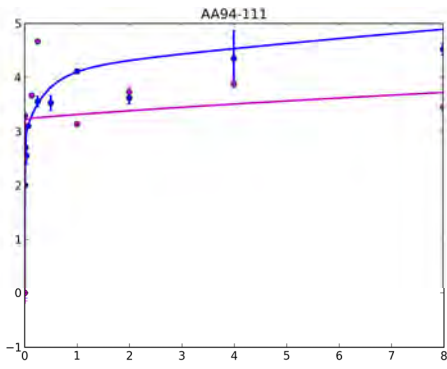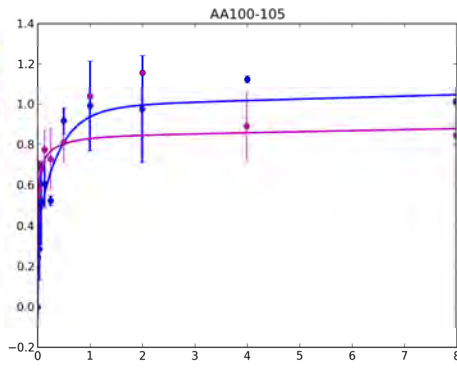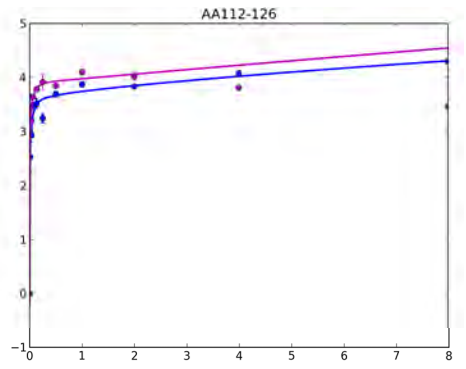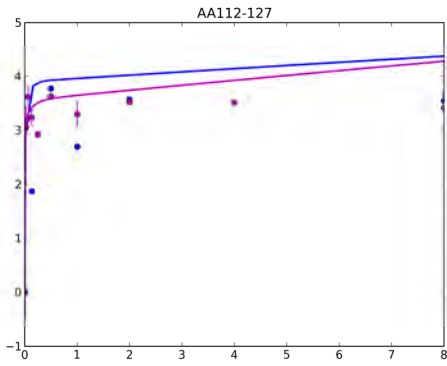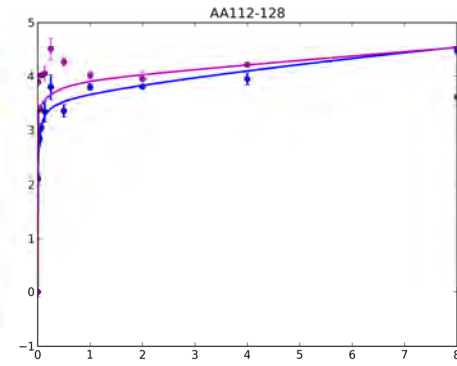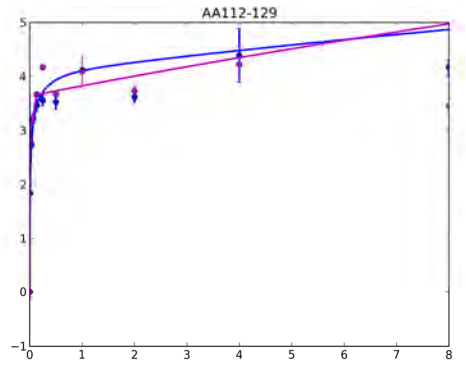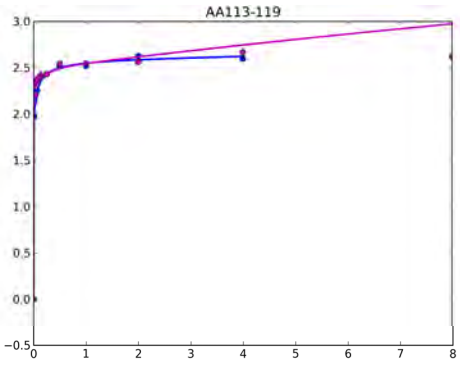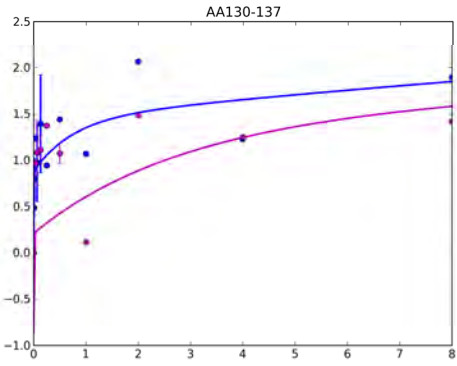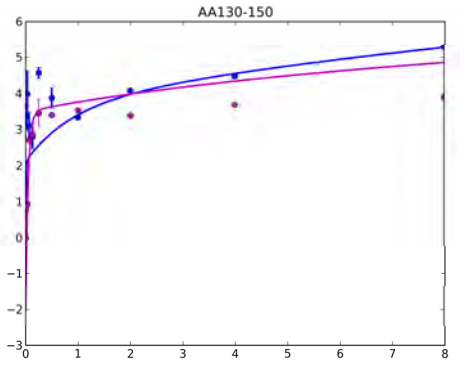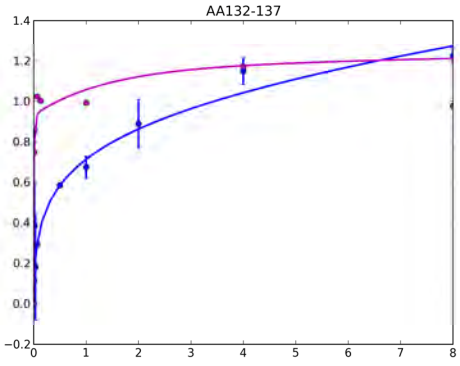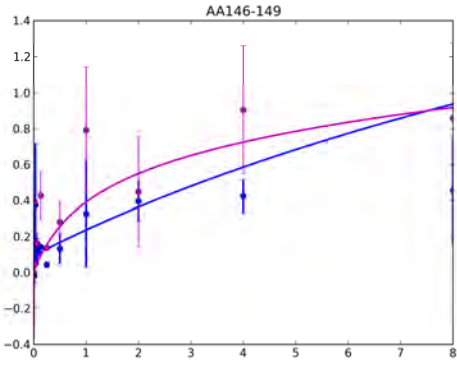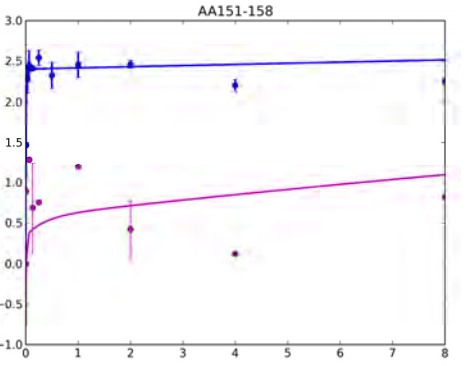

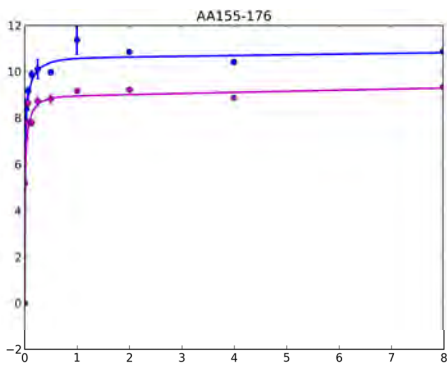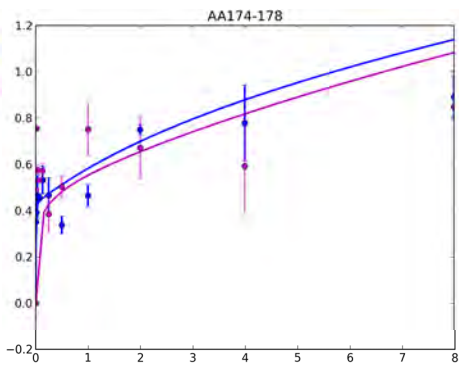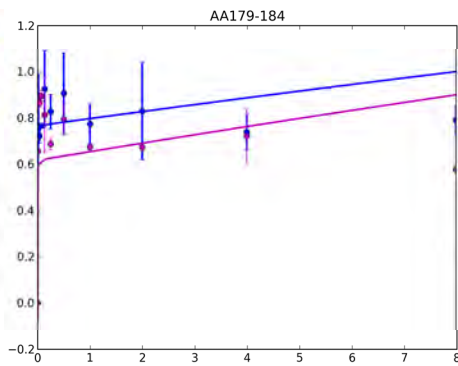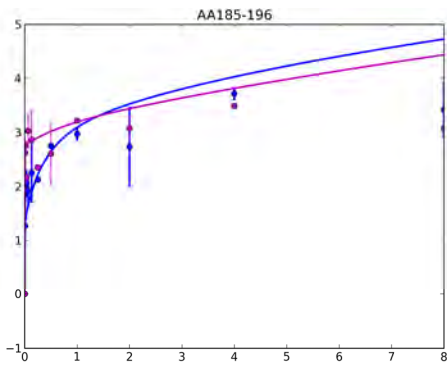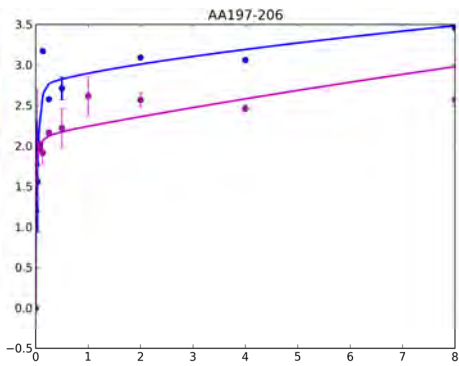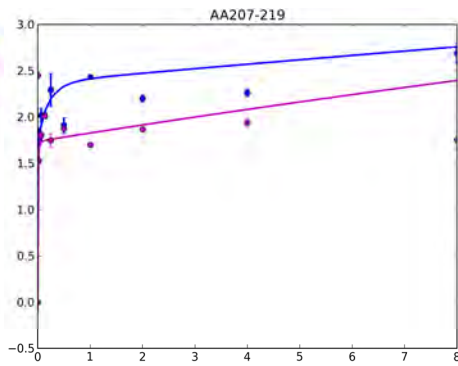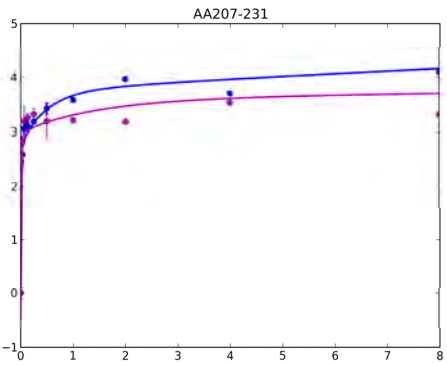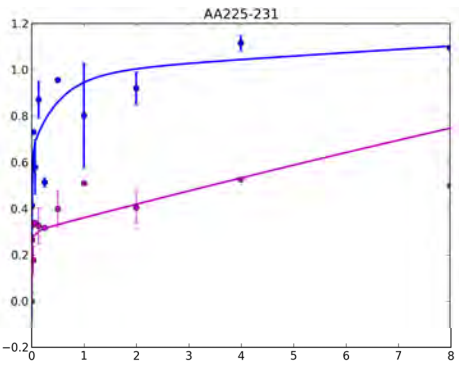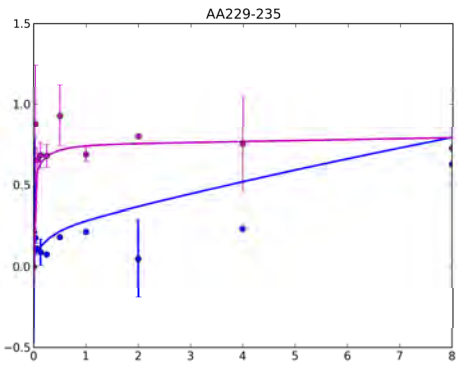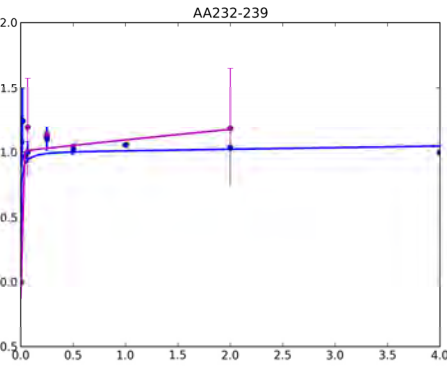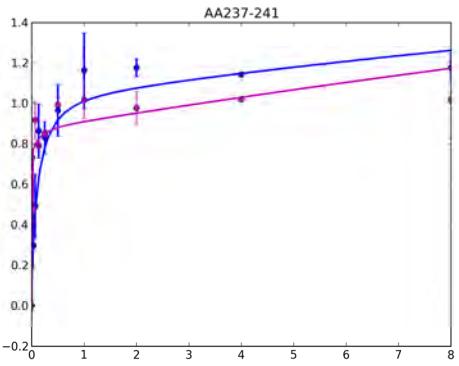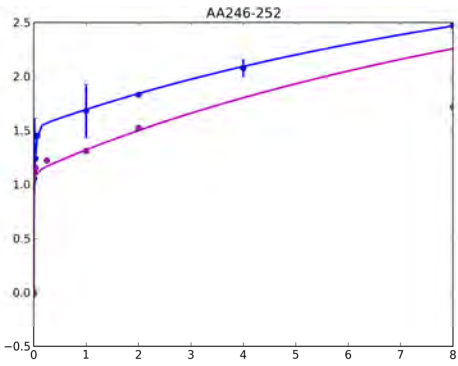

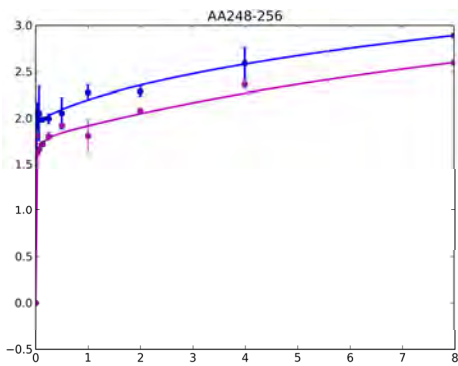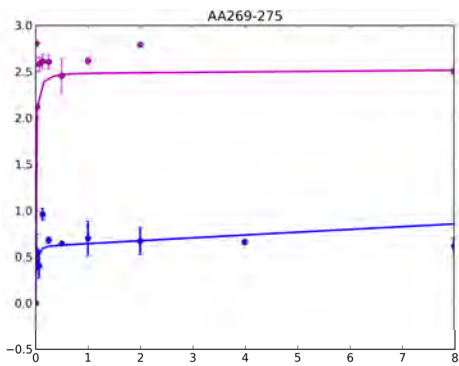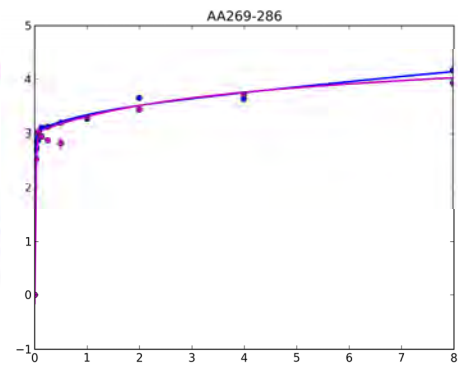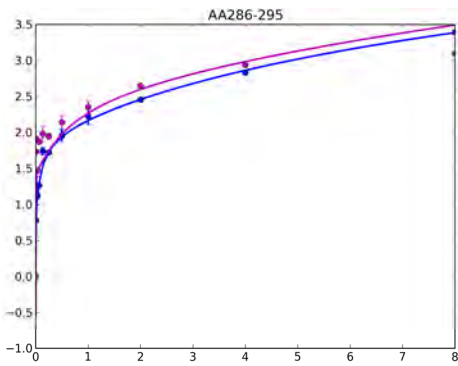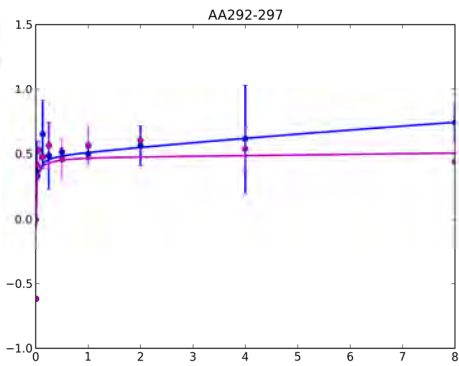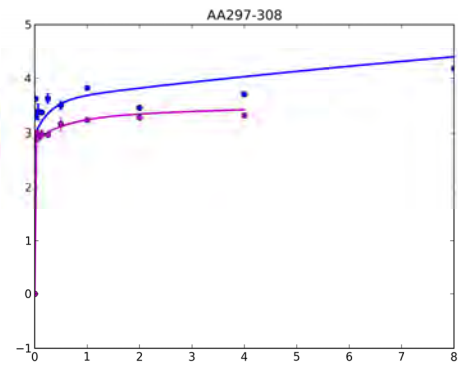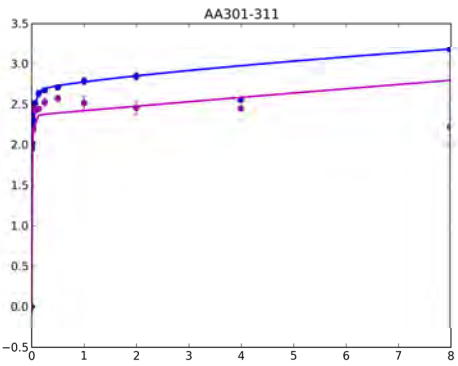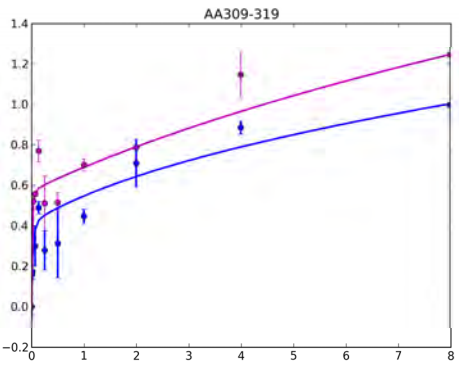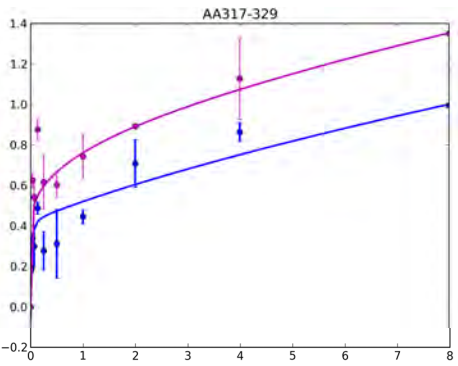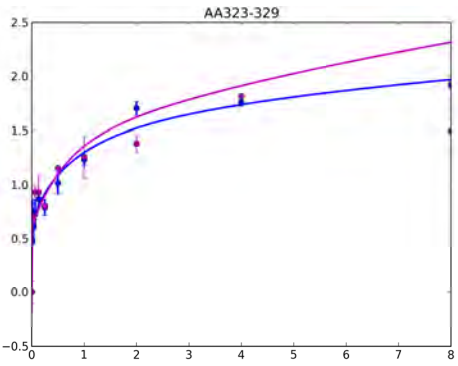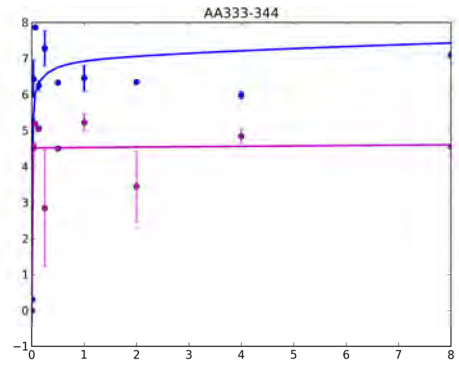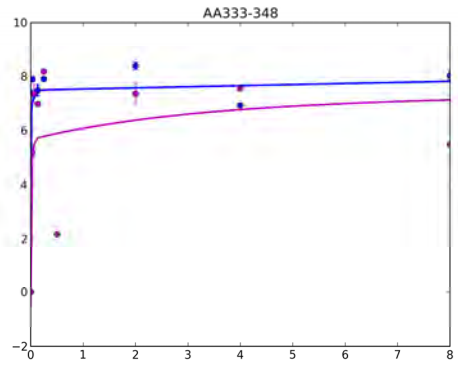

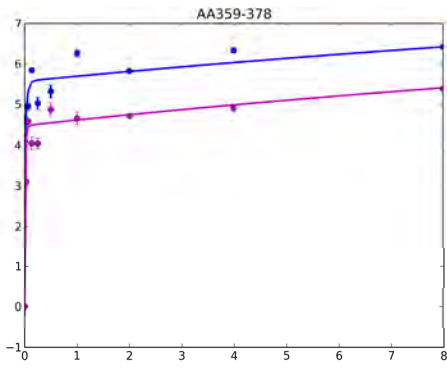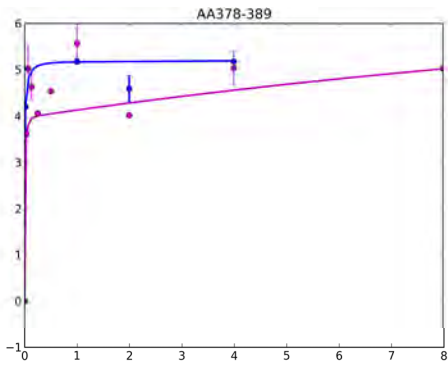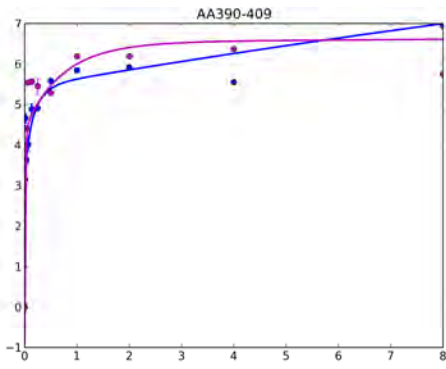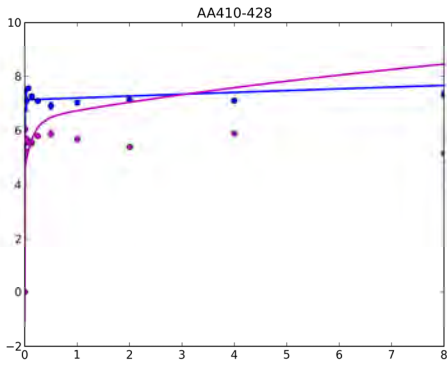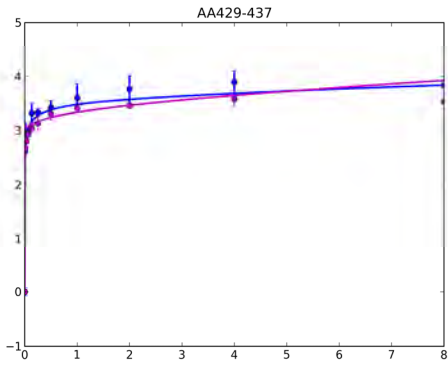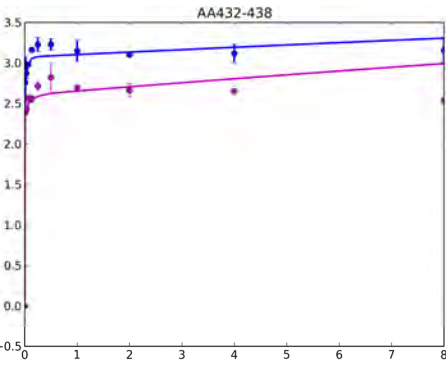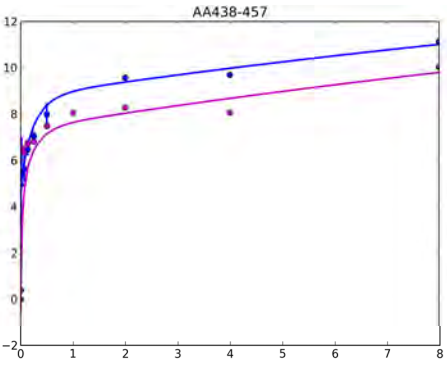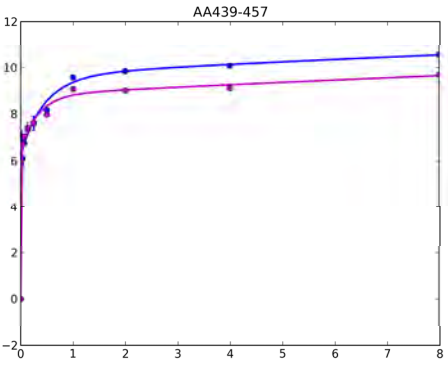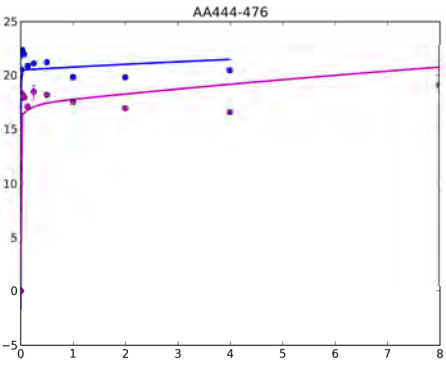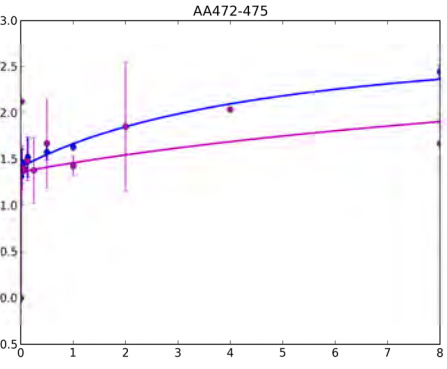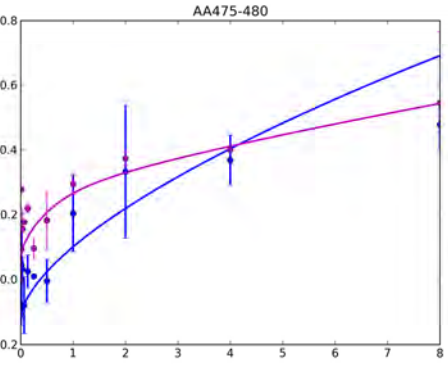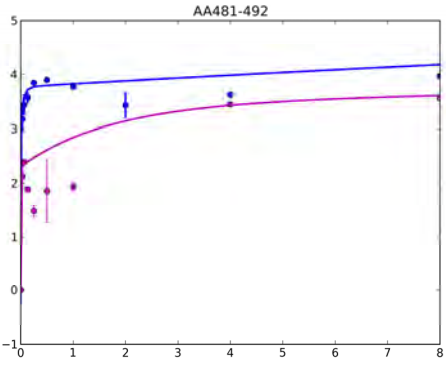



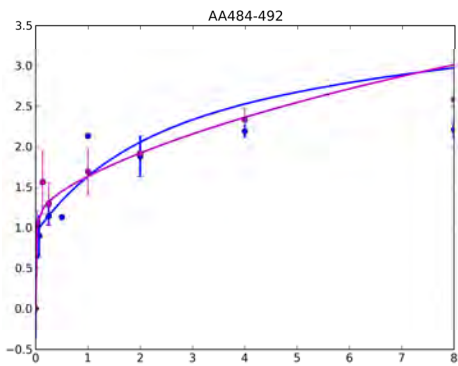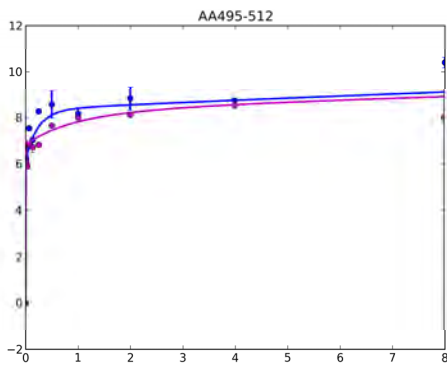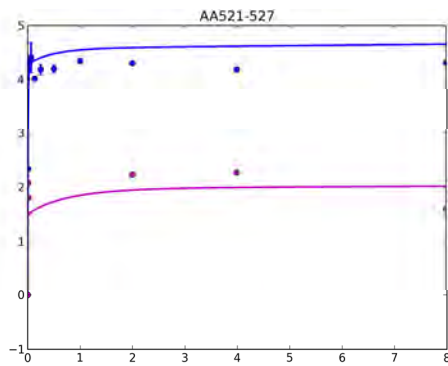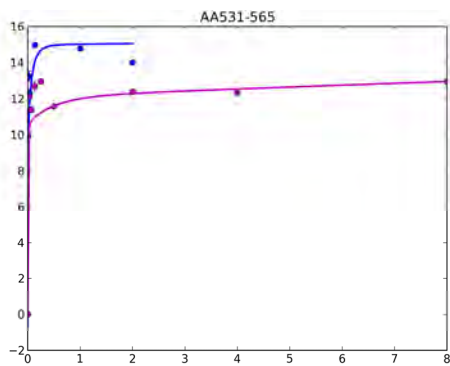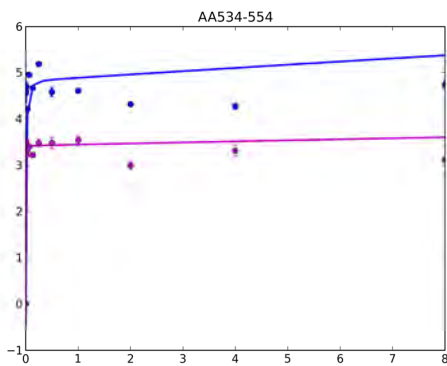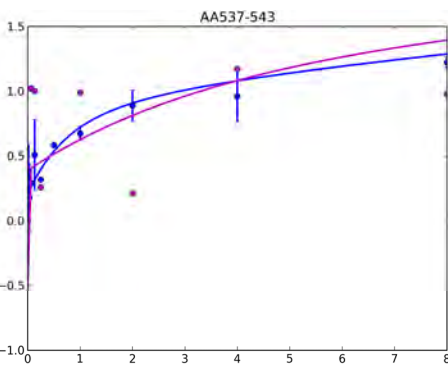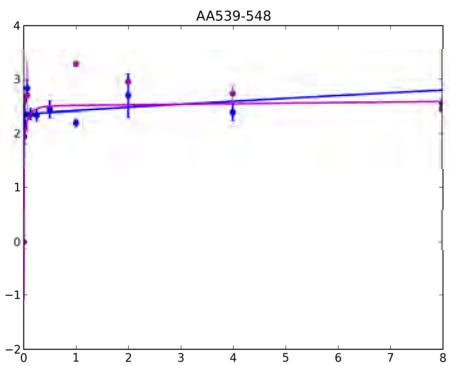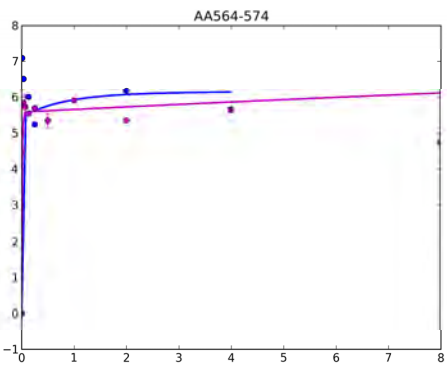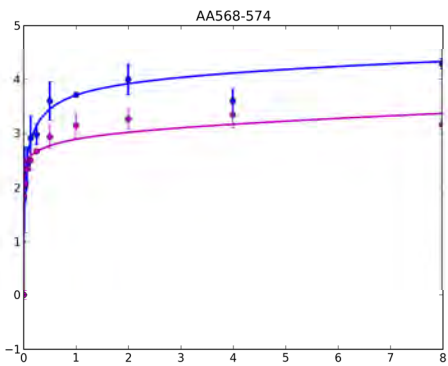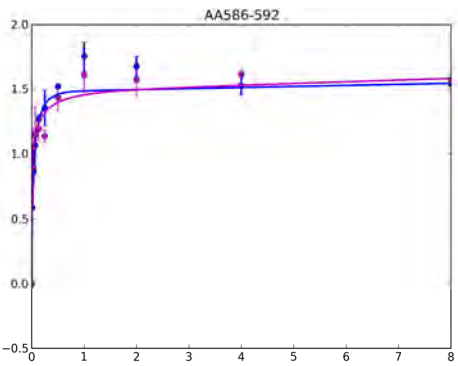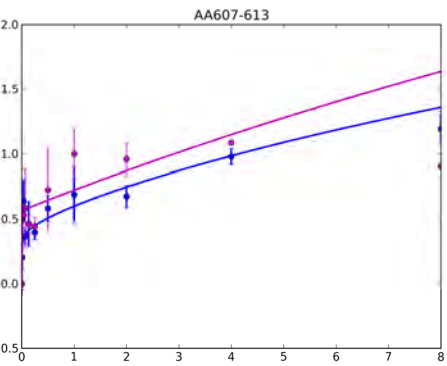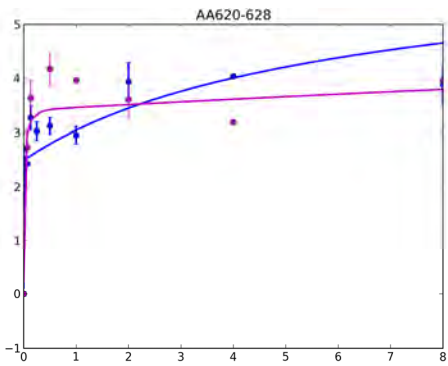

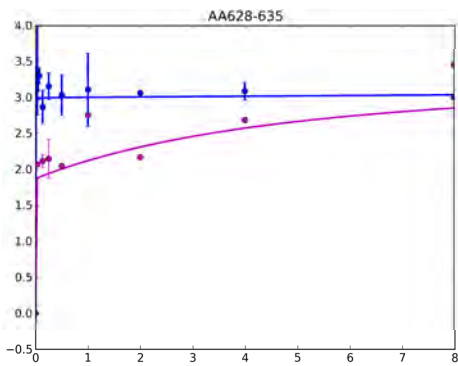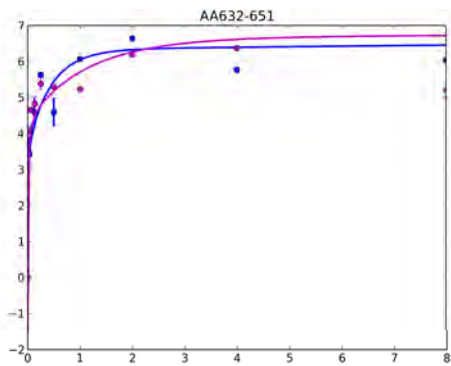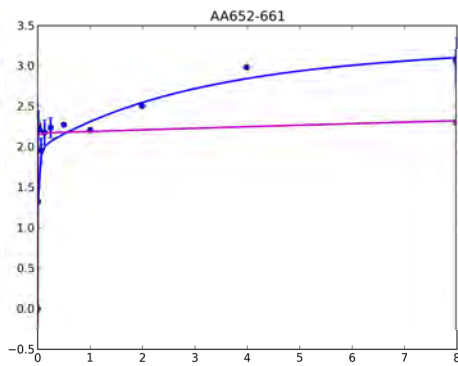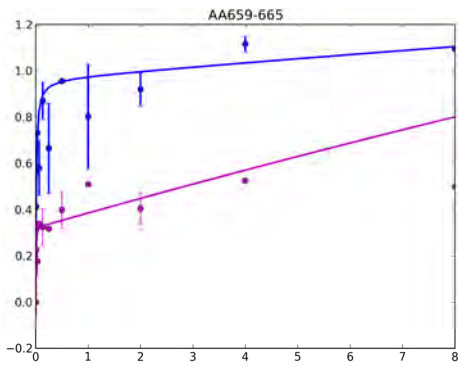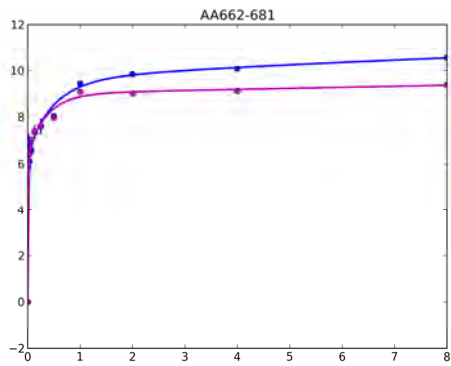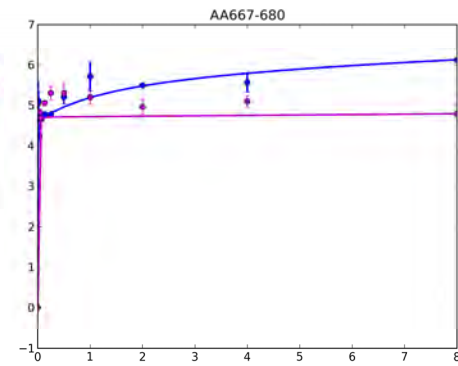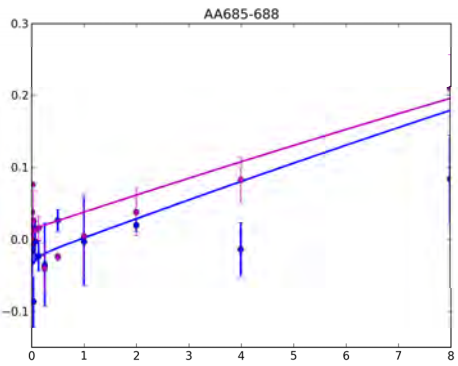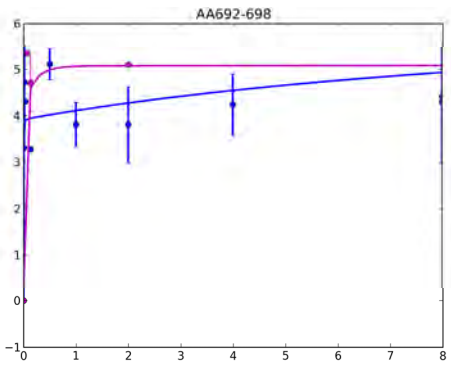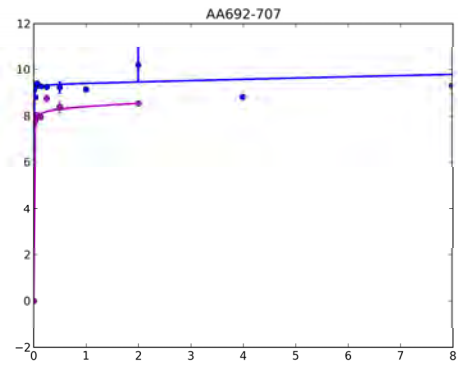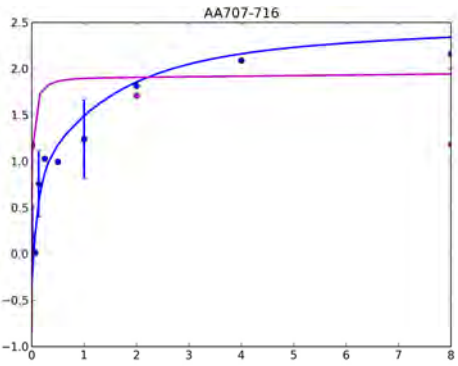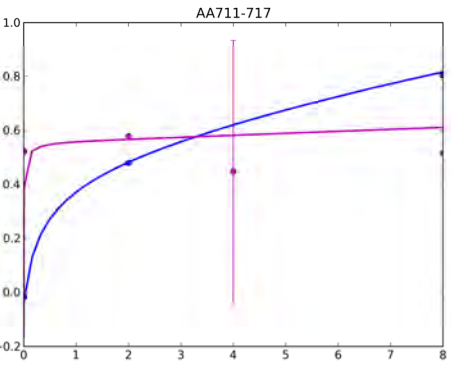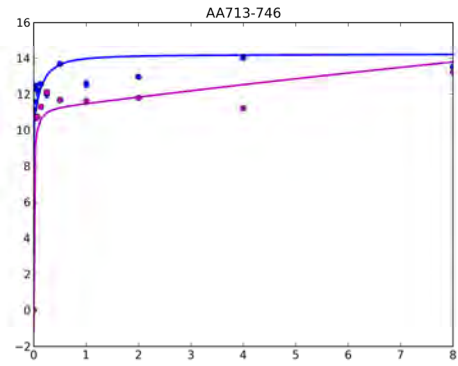

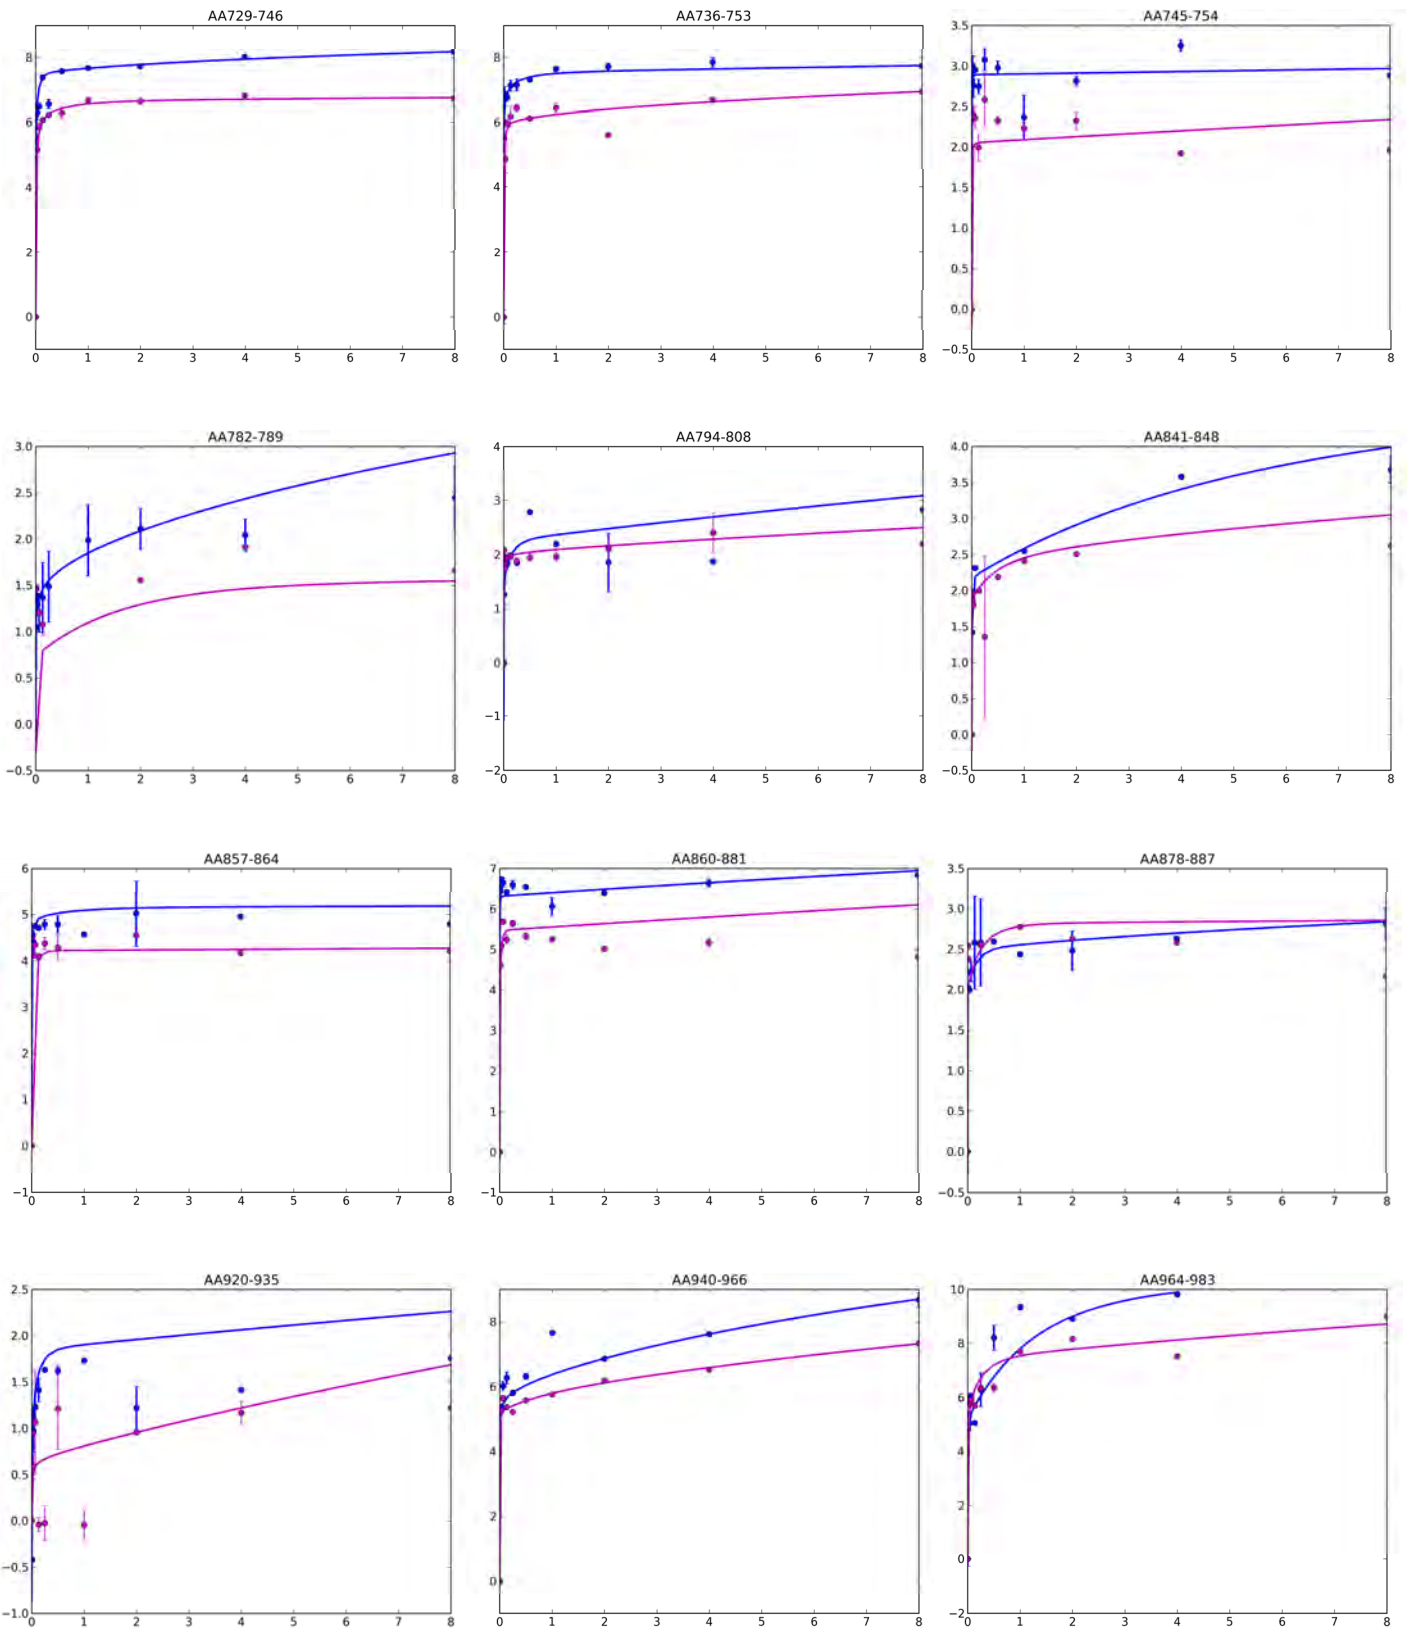



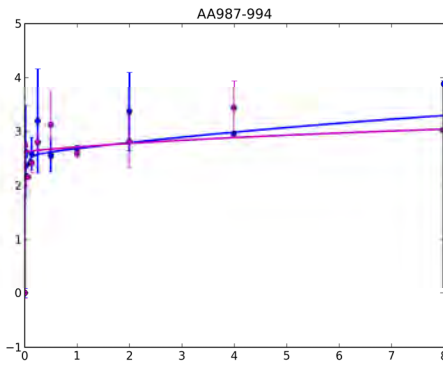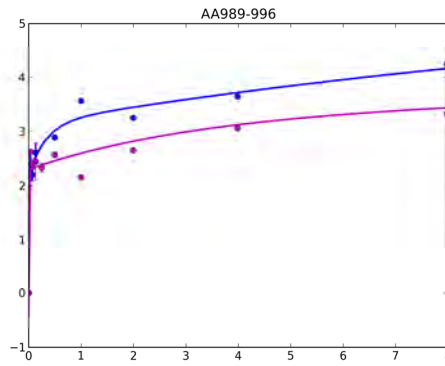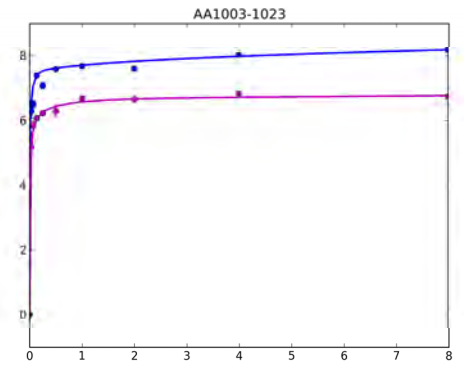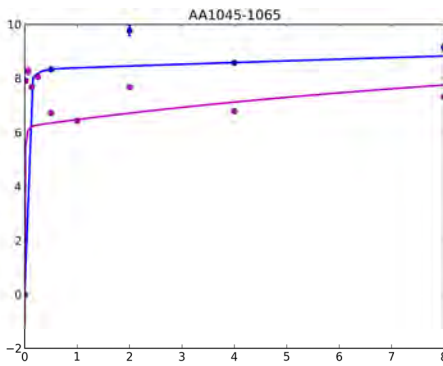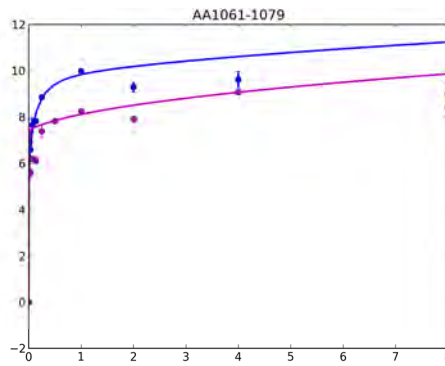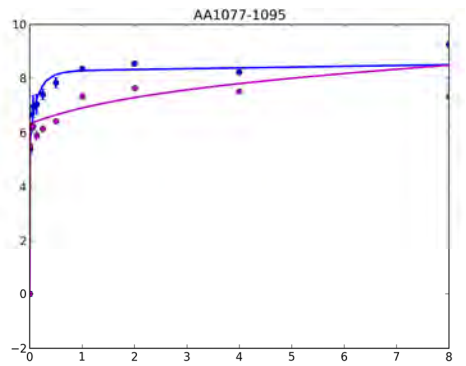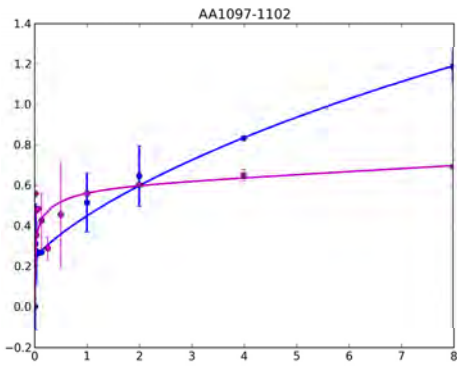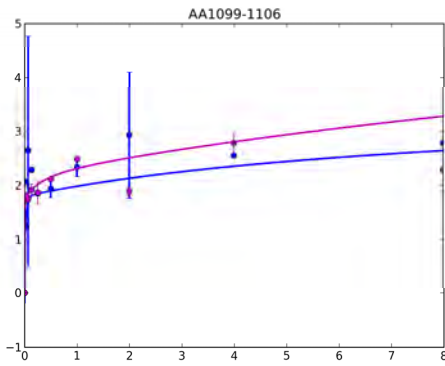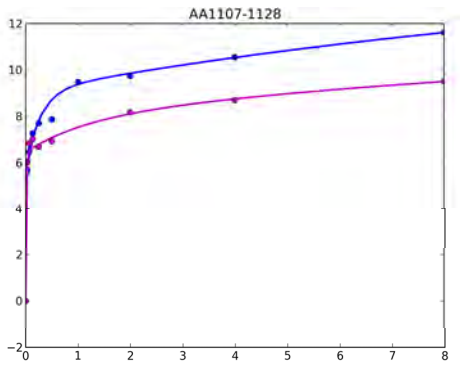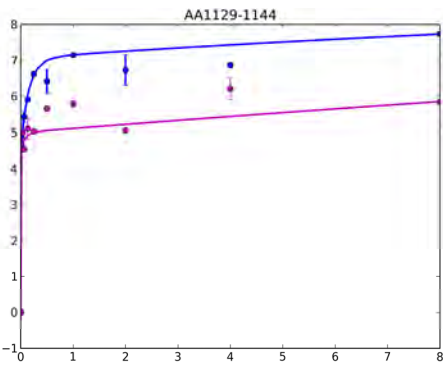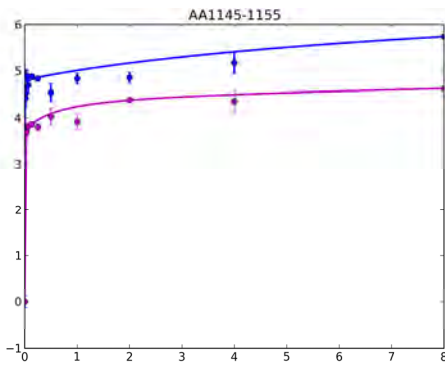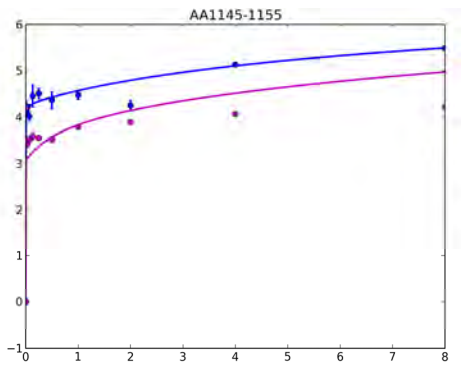

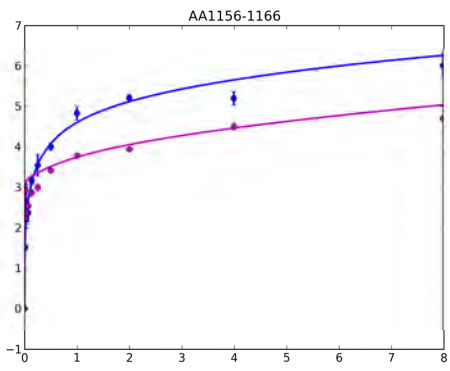

Supplement: NIHMS420666-supplement-2.pdf [file NIHMS420666-supplement-2.pdf]

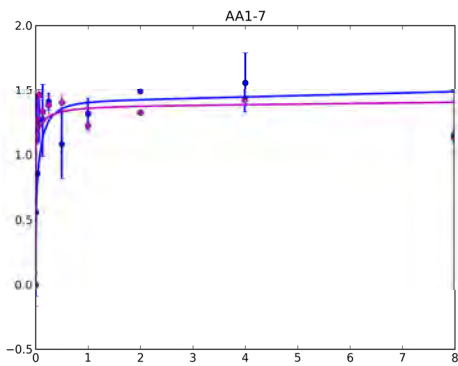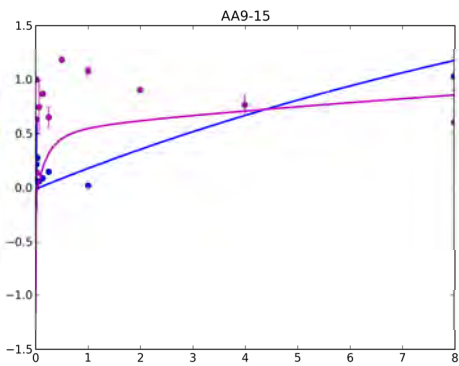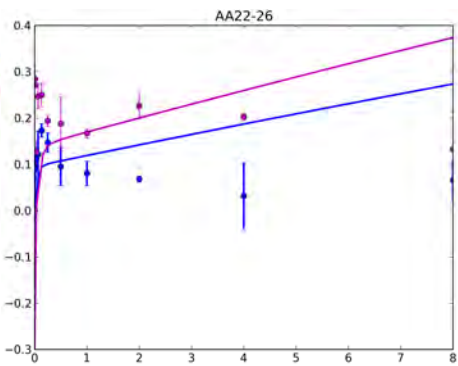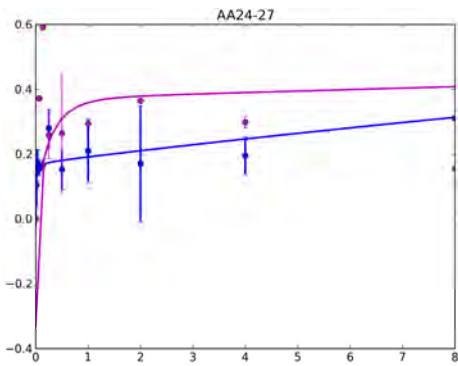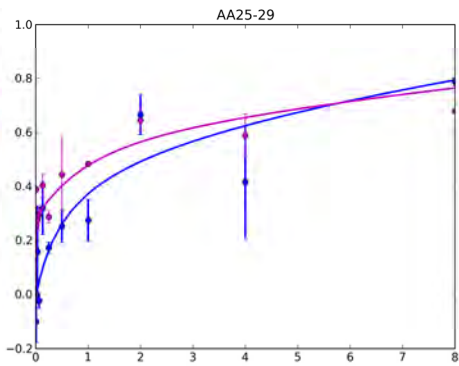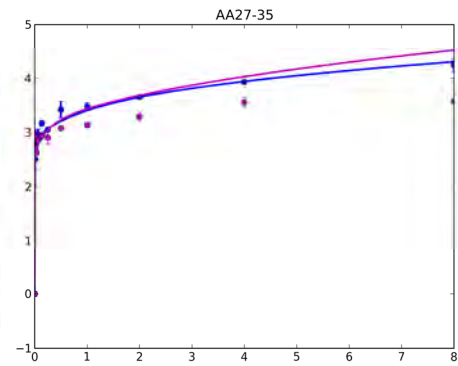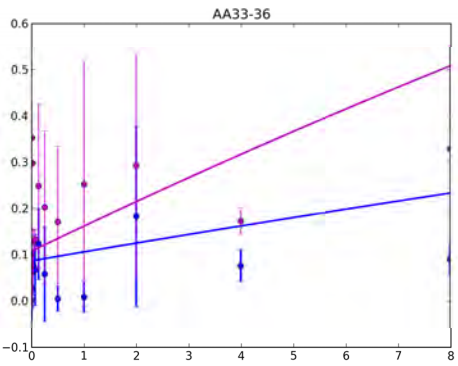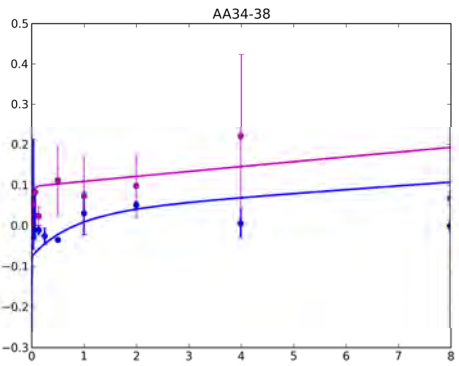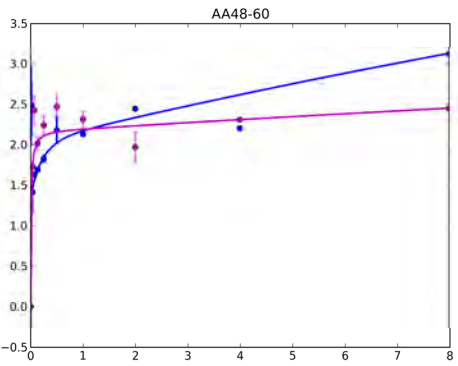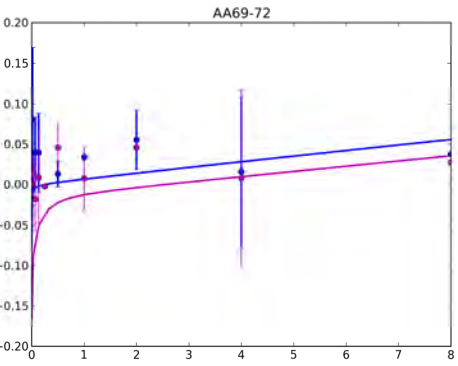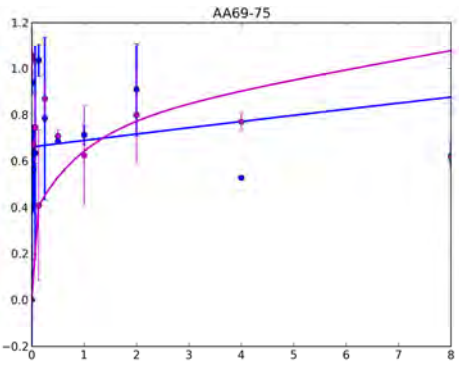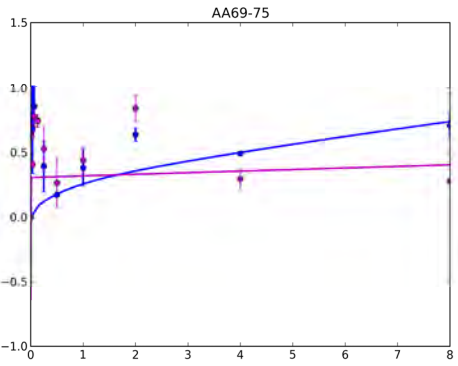

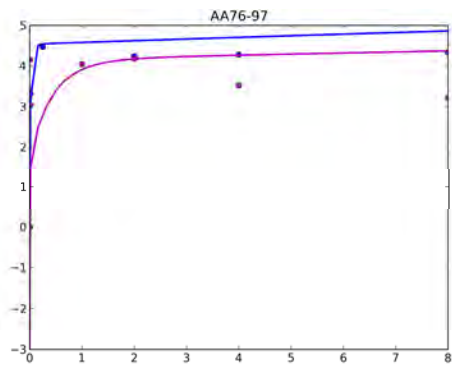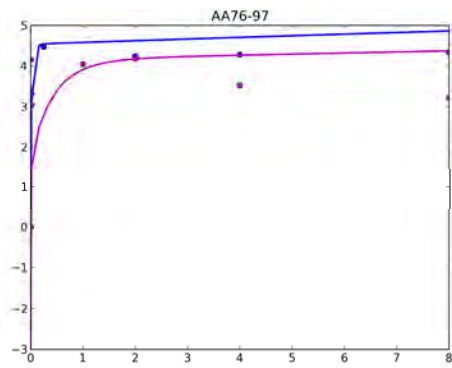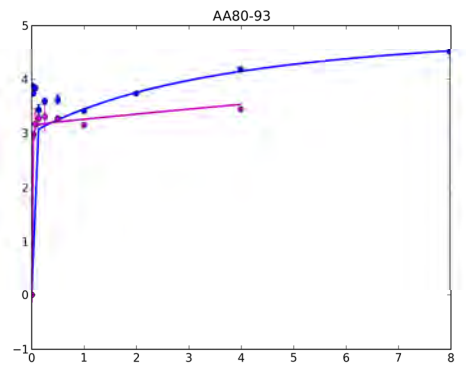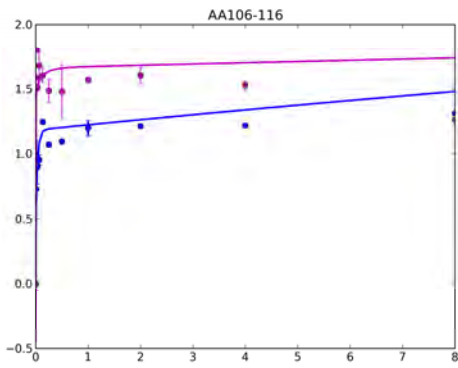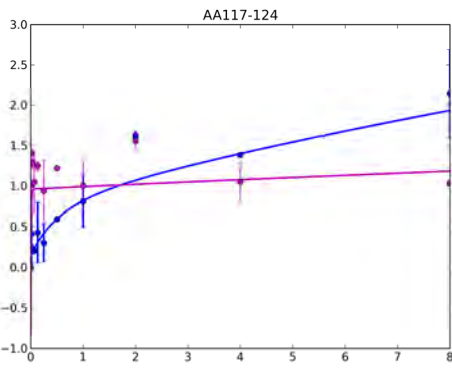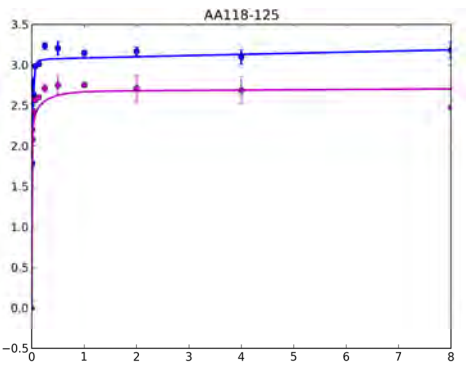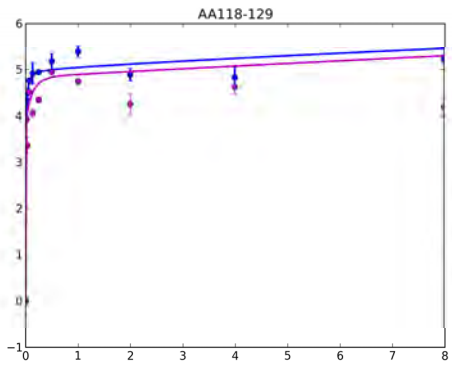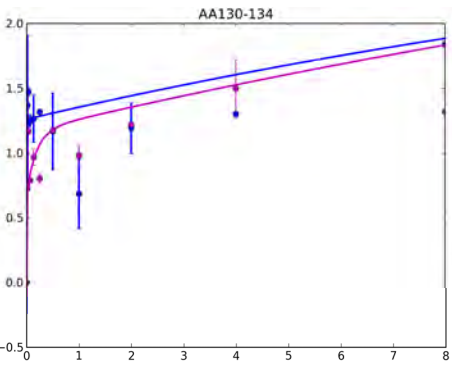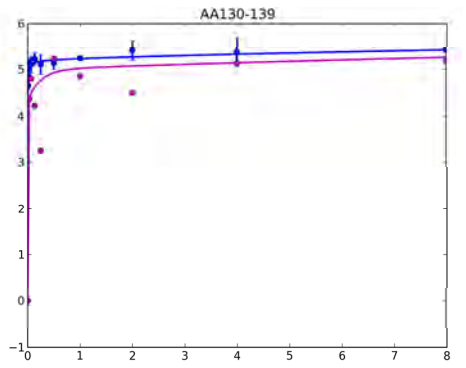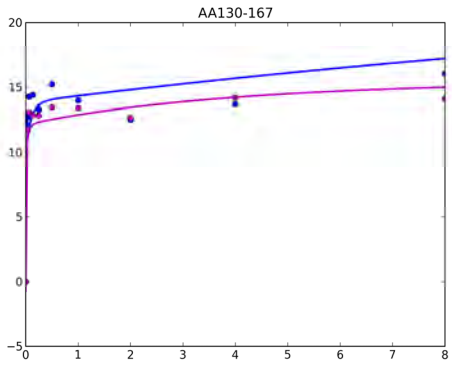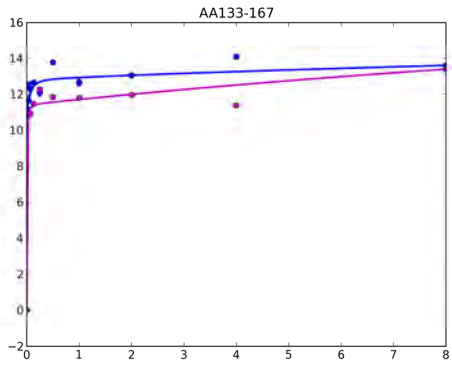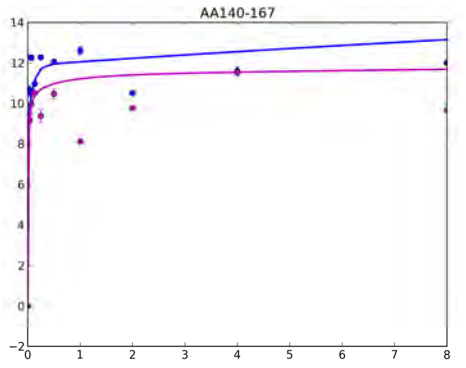

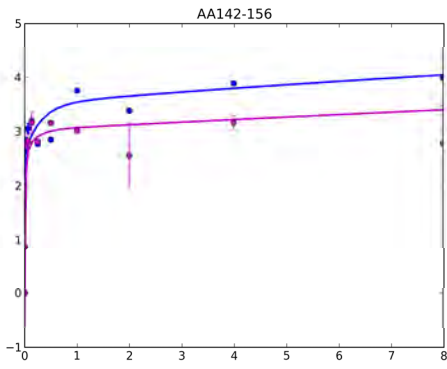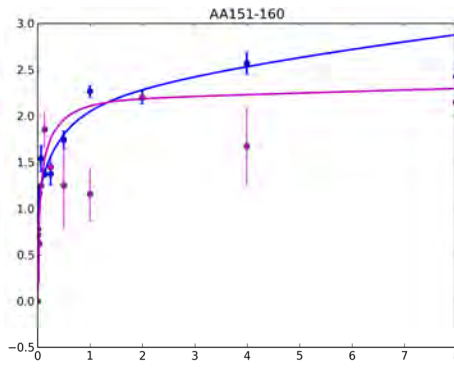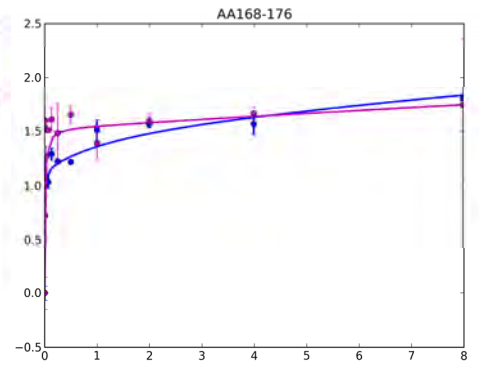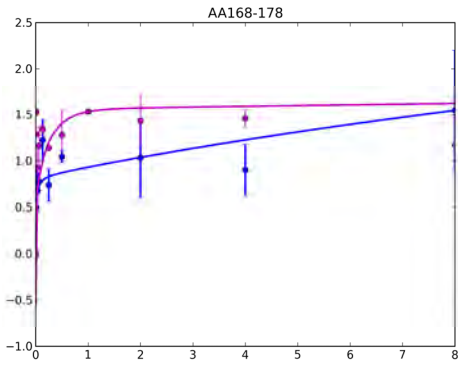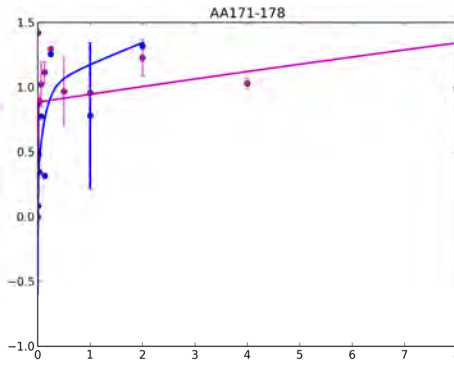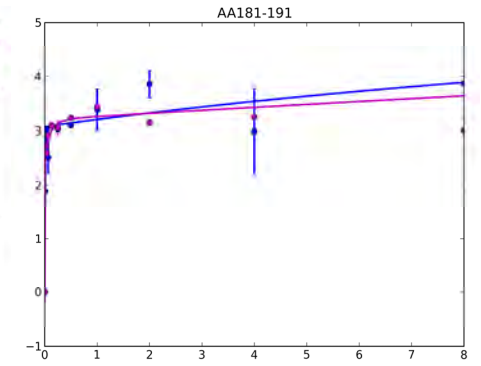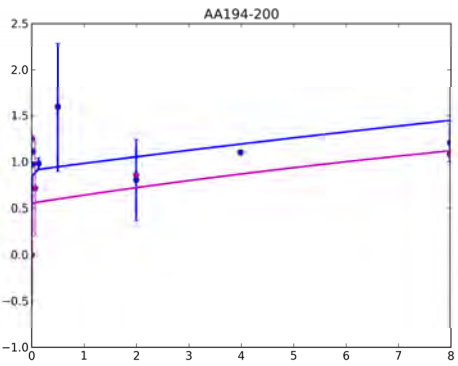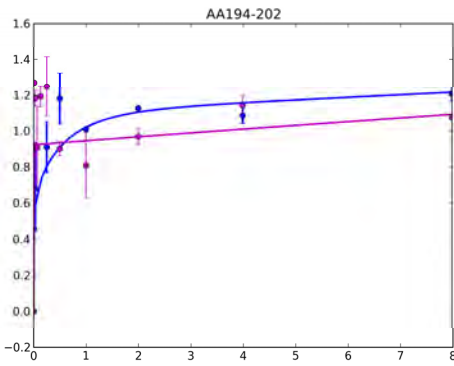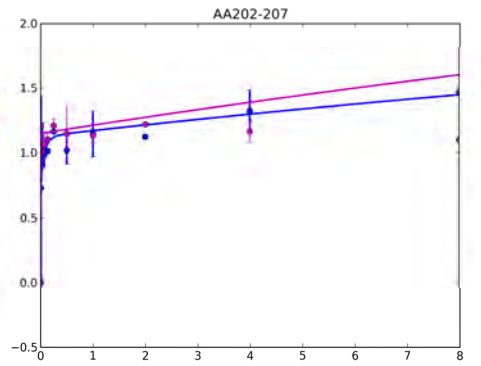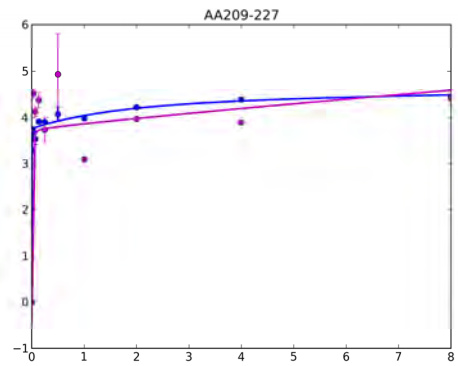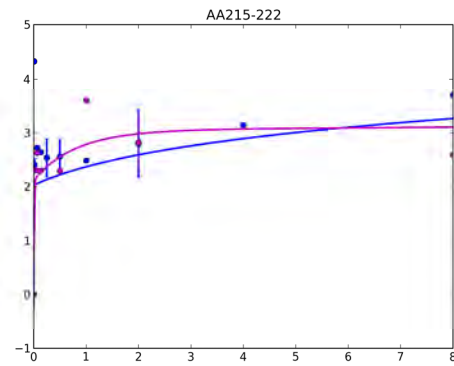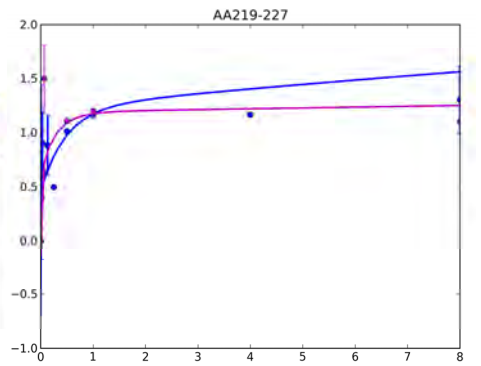

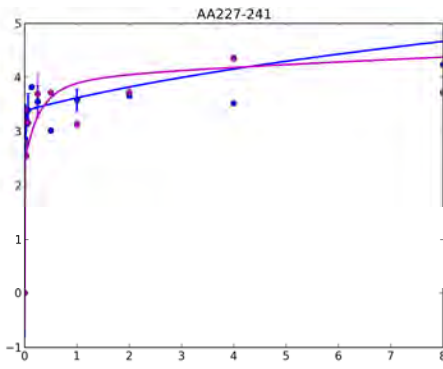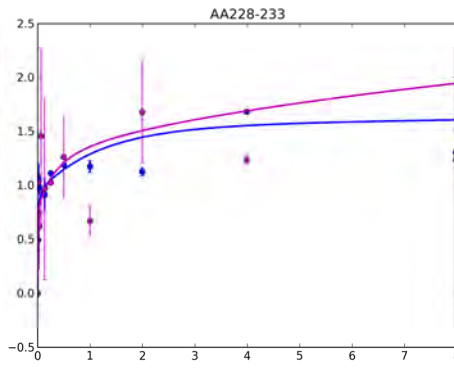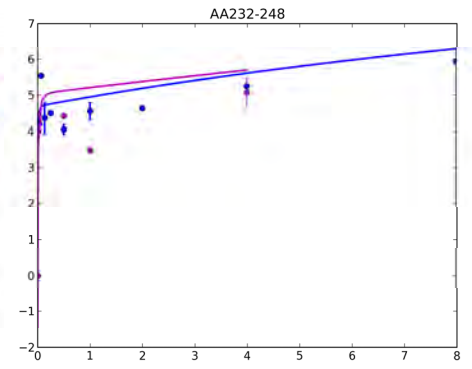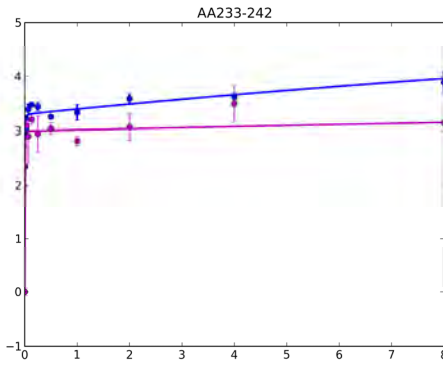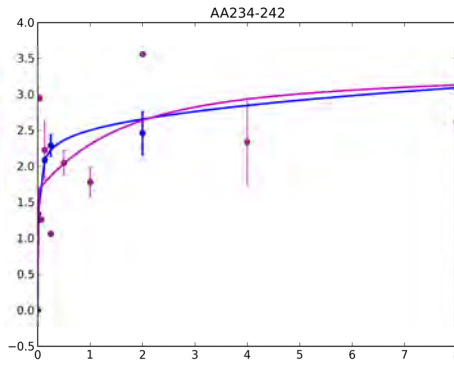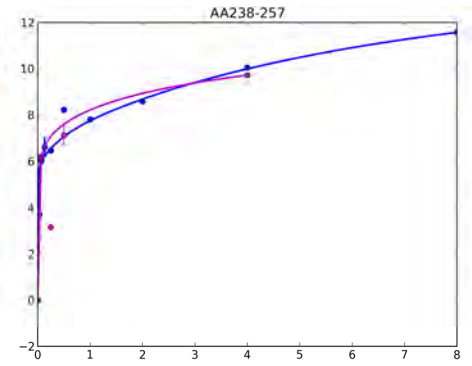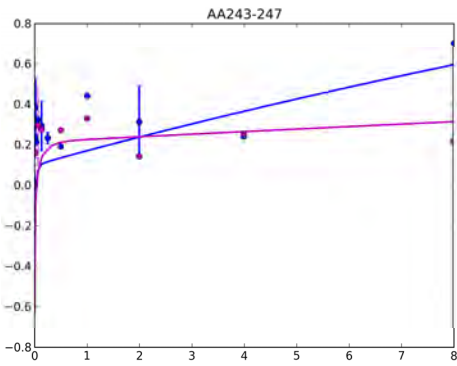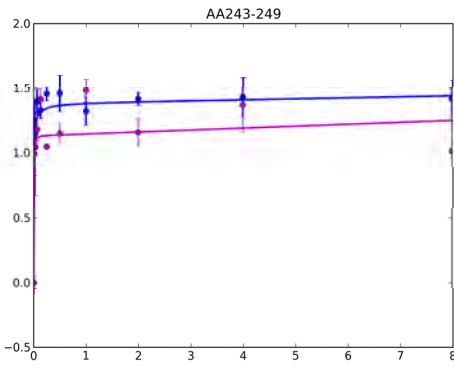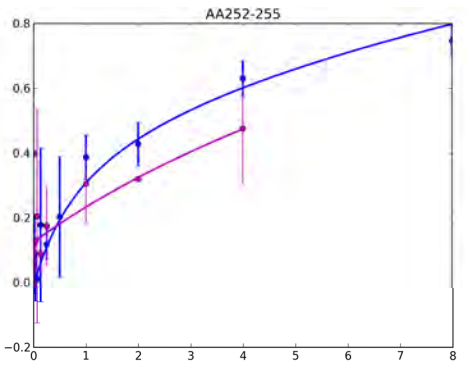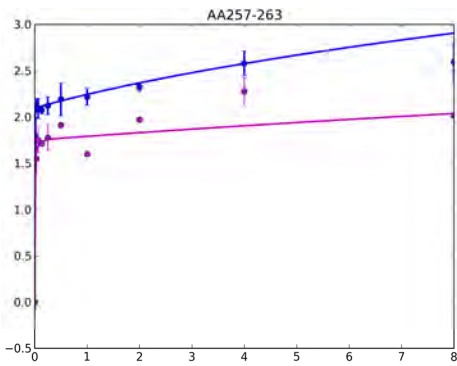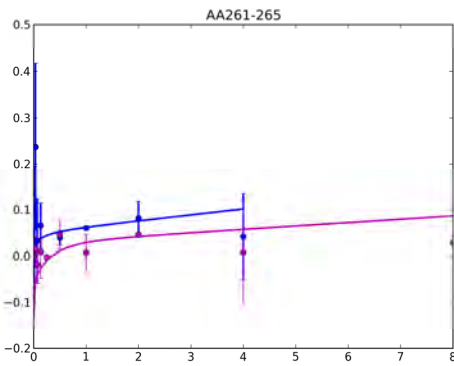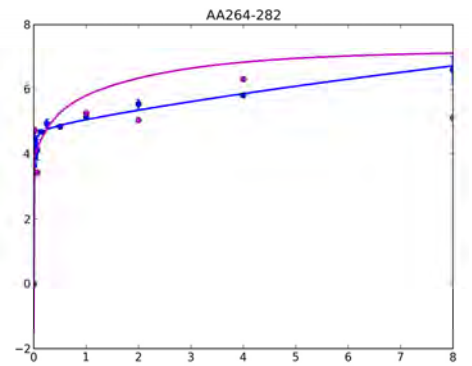

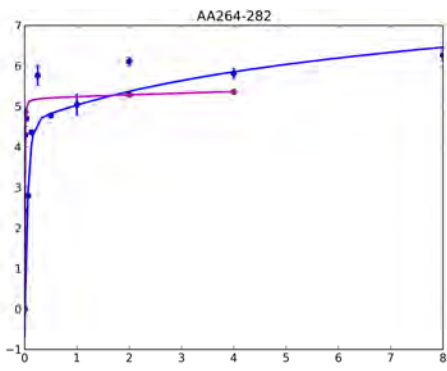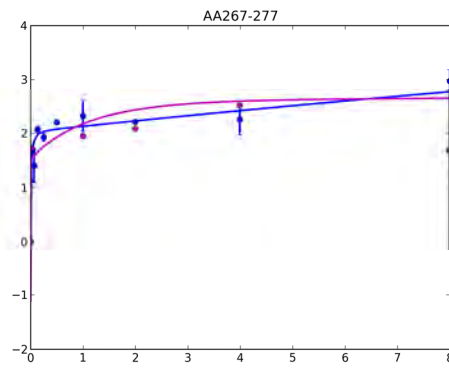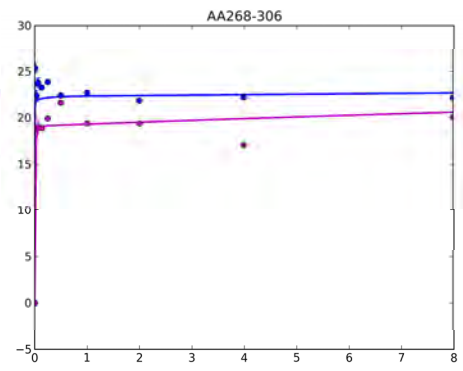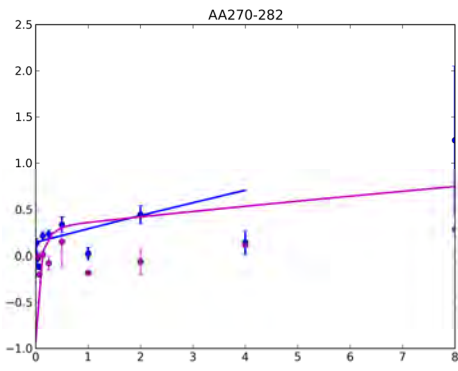

Supplement: NIHMS420666-supplement-3.pdf [file NIHMS420666-supplement-3.pdf]
